# Supplementary material for: In situ functionalization of highly porous polymer microspheres with silver nanoparticles via bio-inspired chemistry
Source: Royal Society of Chemistry journal article supplement (doi:10.1039/c4ra08685f), 2014-01-01
Supplement: c4ra08685f1.pdf [file c4ra08685f1.pdf]

## **Supporting Information**

### **In situ Functionalization of Highly Porous Polymer Microspheres with Silver Nanoparticles via Bio-inspired Chemistry**

**Ho Yeon Son, Dong Jae Lee, Jun Bae Lee, Chun Ho Park, Mintae Seo,  
Jihui Jang, Su Ji Kim, Moungh Seok Yoon, and Yoon Sung Nam**

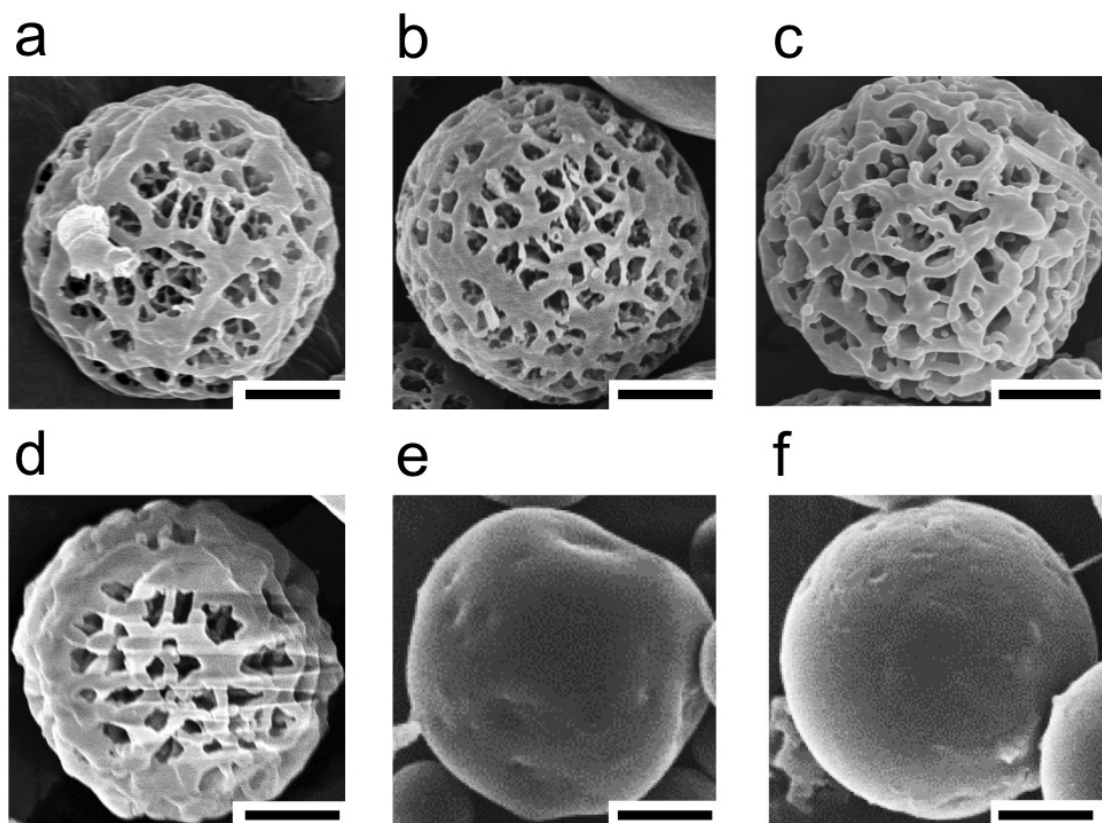

**Figure S1.** SEM photographs of the prepared PMMA microspheres prepared using different volumes of DCM were used: 3 mL (a), 4 mL (b), 5 mL (c), 6 mL (d), 7 mL (e), and 8 mL (f). Scale bar = 5  $\mu\text{m}$ .
